# Supplementary material
Source: publisher figshare collection journal article supplement (https://sage.figshare.com/ndownloader/files/30723464)

**Supplementary Figure S1. Funnel plots. a** postoperative pulmonary complication, **b** length of hospital stay

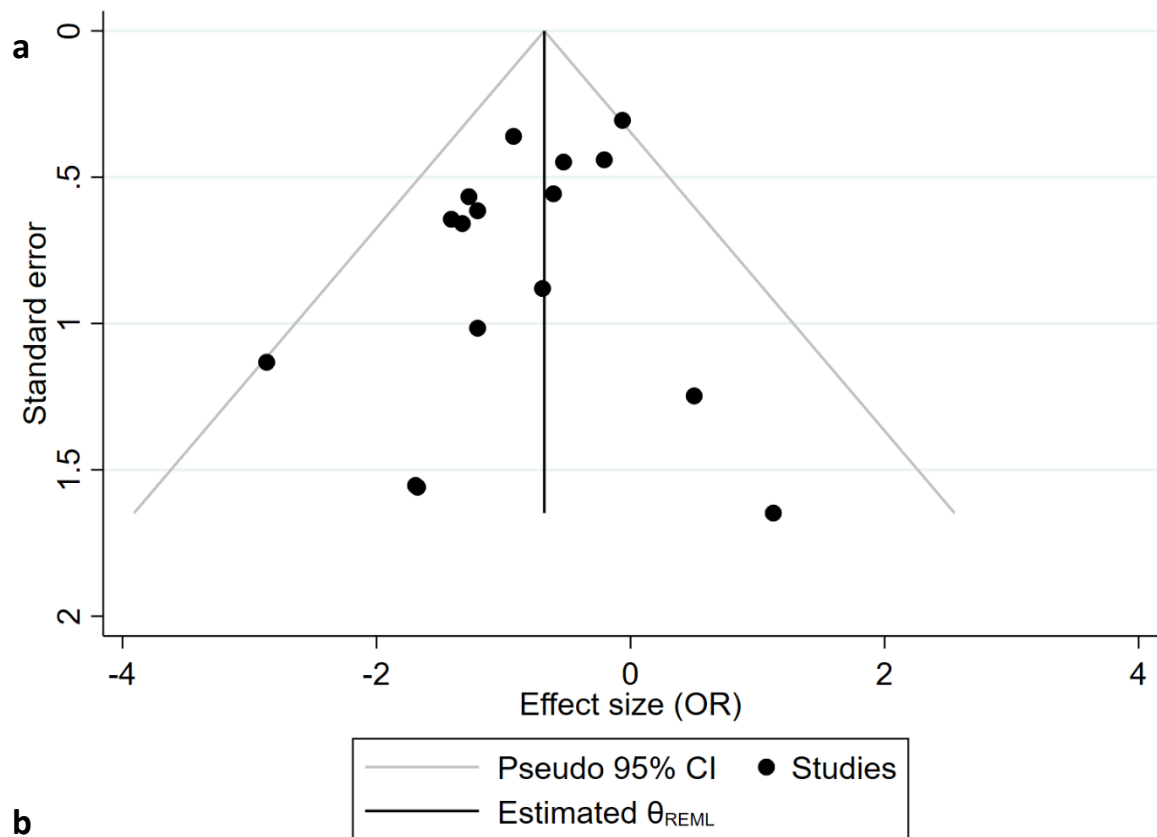

**b**

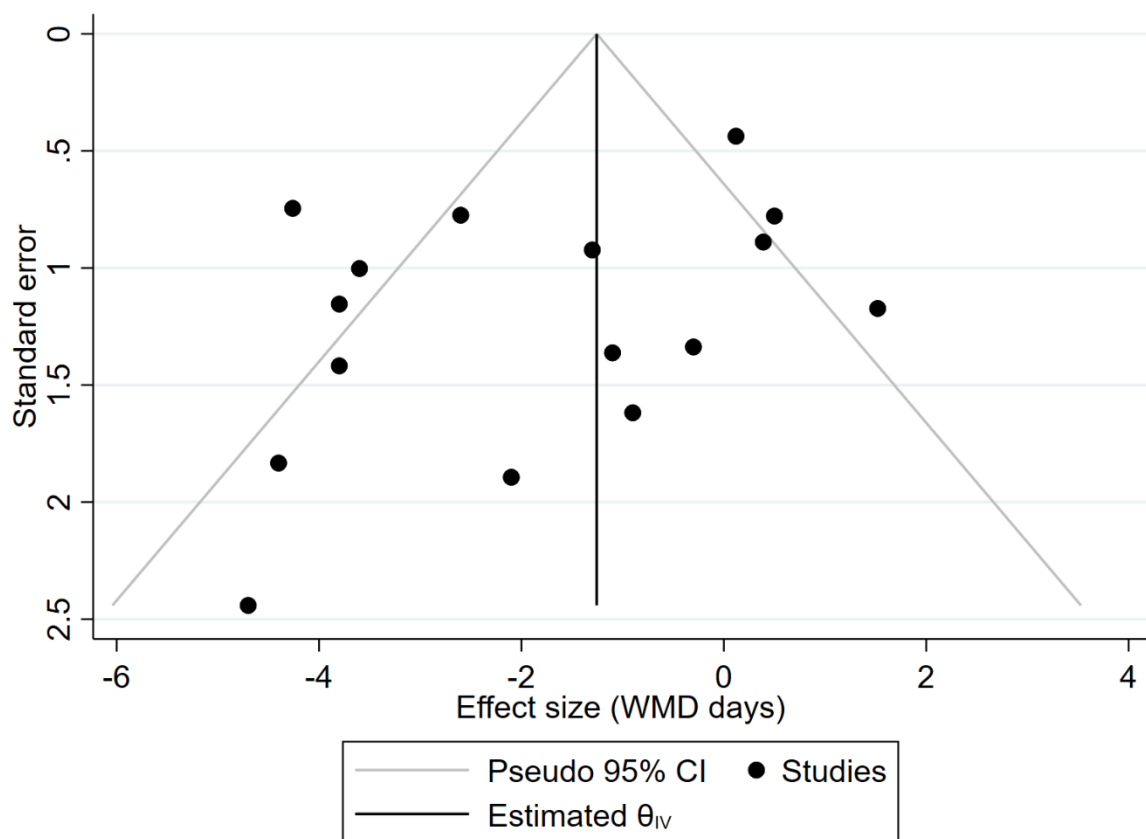

Supplement: Supplementary file 1 [file 30723464]
